# Supplementary material
Source: PubMed Central journal article supplement (PMC9936384)
Supplement: jamaophthalmol-e226413-s001.pdf [file jamaophthalmol-e226413-s001.pdf]

## Supplemental Online Content

Bothun ED, Repka MX, Kraker RT, et al; Pediatric Eye Disease Investigator Group. Incidence of glaucoma-related adverse events in the first 5 years after pediatric lensectomy. *JAMA Ophthalmol*. Published online February 16, 2023. doi:10.1001/jamaophthalmol.2022.6413

**eTable 1.** Participant Characteristics According to Primary Intraocular Lens Implantation

**eTable 2.** Eyes with Initial Glaucoma Surgery Performed in First Five Years following Lensectomy

This supplemental material has been provided by the authors to give readers additional information about their work.

**eTable 1. Participant Characteristics According to Primary Intraocular Lens Implantation**

|                                | Aphakia<br>N=321 Participants |     | Pseudophakia<br>N=489 Participants |     |
|--------------------------------|-------------------------------|-----|------------------------------------|-----|
|                                | n                             | %   | n                                  | %   |
| <b>Sex: Female</b>             | 176                           | 55% | 230                                | 47% |
| <b>Age at First Lensectomy</b> |                               |     |                                    |     |
| <6 weeks                       | 95                            | 30% | 0                                  | 0   |
| 6 weeks to <3 months           | 87                            | 27% | 4                                  | <1% |
| 3 months to <6 months          | 55                            | 17% | 3                                  | <1% |
| 6 months to <2 years           | 53                            | 17% | 70                                 | 14% |
| 2 years to <3 years            | 3                             | <1% | 50                                 | 10% |
| 3 years to <5 years            | 9                             | 3%  | 105                                | 21% |
| 5 years to <8 years            | 9                             | 3%  | 139                                | 28% |
| 8 years to <13 years           | 10                            | 3%  | 118                                | 24% |
| Mean (SD), years               | 0.89 (1.97)                   |     | 5.65 (3.32)                        |     |
| Median (Range), years          | 0.21 (0.04 to 12.40)          |     | 5.32 (0.13 to 12.98)               |     |
| <b>Race / Ethnicity</b>        |                               |     |                                    |     |
| American Indian/Alaskan Native | 2                             | <1% | 3                                  | <1% |
| Asian                          | 9                             | 3%  | 18                                 | 4%  |
| Black/African American         | 41                            | 13% | 63                                 | 13% |
| Hispanic or Latino             | 10                            | 3%  | 29                                 | 6%  |
| More than one race             | 14                            | 4%  | 18                                 | 4%  |
| Unknown/not reported           | 6                             | 2%  | 13                                 | 3%  |
| White                          | 239                           | 74% | 345                                | 71% |

SD = standard deviation

**eTable 2: Eyes with Initial Glaucoma Surgery Performed in First Five Years following Lensectomy**

|                                                               | <b>Aphakia<br/>N= 33 Eyes</b> | <b>Pseudophakia<br/>N= 3 Eyes</b> |
|---------------------------------------------------------------|-------------------------------|-----------------------------------|
| <b>Initial Glaucoma Surgery</b>                               | <b>n</b>                      | <b>n</b>                          |
| Trabeculotomy                                                 | 5                             | 0                                 |
| Trabeculectomy                                                | 5                             | 0                                 |
| Trabeculotomy and Trabeculectomy combined                     | 3                             | 0                                 |
| Goniotomy                                                     | 4                             | 0                                 |
| Drainage Device                                               | 8                             | 2                                 |
| Endocyclophotocoagulation                                     | 1                             | 1                                 |
| Drainage Device and Endocyclophotocoagulation                 | 1                             | 0                                 |
| Peripheral Iridectomy with Anterior Vitrectomy                | 1                             | 0                                 |
| Selective Laser Trabeculoplasty                               | 1                             | 0                                 |
| Unknown                                                       | 4                             | 0                                 |
| <b>Months between Lensectomy and Initial Glaucoma Surgery</b> | <b>n (%)</b>                  | <b>n (%)</b>                      |
| <3 months                                                     | 9 (27%)                       | 0                                 |
| 3 months to <6 months                                         | 6 (18%)                       | 0                                 |
| 6 months to < 3 years                                         | 11 (33%)                      | 1 (33%)                           |
| >= 3 years                                                    | 7 (21%)                       | 2 (67%)                           |
| Median months<br>(Range)                                      | 7.1<br>(0.9, 57.9)            | 37.9<br>(8.6, 47.9)               |
| <b>Age at Time of Lensectomy</b>                              | <b>n (%)</b>                  | <b>n (%)</b>                      |
| <3 months                                                     | 29 (88%)                      | 1 (33%)                           |
| 3 to <6 months                                                | 2 (6%)                        | 0                                 |
| ≥6 months                                                     | 2 (6%)                        | 2 (67%)                           |
| Median months<br>(Range)                                      | 0.1<br>(0.1, 5.8)             | 4.3<br>(0.2, 11.6)                |
| <b>Glaucoma Medications Being Used after Glaucoma Surgery</b> | <b>n (%)</b>                  | <b>n (%)</b>                      |
| Yes                                                           | 22 (67%)                      | 2                                 |
| No                                                            | 7 (21%)                       | 1                                 |
| Unknown                                                       | 4 (12%)                       | 0                                 |
