# Supplementary material
Source: PubMed Central journal article supplement (PMC9936384)
Supplement: jamaophthalmol-e226413-s002.pdf [file jamaophthalmol-e226413-s002.pdf]

\*Indicates required information. Only first name, last name, and suffix will appear in PubMed.

| <b>*Group Name(s): Pediatric Eye Disease Investigator Group</b> |                   |                              |                  |                                                      |                                          |                                                         |                                                                                            |
|-----------------------------------------------------------------|-------------------|------------------------------|------------------|------------------------------------------------------|------------------------------------------|---------------------------------------------------------|--------------------------------------------------------------------------------------------|
| <b>*First Name and Middle Initial(s)</b>                        | <b>*Last Name</b> | <b>*Suffix (eg, Jr, III)</b> | Academic Degrees | Institution                                          | Location (city, state/province, country) | Role or Contribution, eg, chair, principal investigator | Group (if more than 1 Group listed in the byline and/or Subgroup (eg, Steering Committee)) |
| David K.                                                        | Wallace           |                              |                  | Duke University Eye Center                           | Durham, NC                               | Investigator                                            |                                                                                            |
| Laura B.                                                        | Enyedi            |                              |                  | Duke University Eye Center                           | Durham, NC                               | Investigator                                            | Executive Committee                                                                        |
| Sasapin                                                         | Prakalapakorn     |                              |                  | Duke University Eye Center                           | Durham, NC                               | Investigator                                            |                                                                                            |
| Sarah K.                                                        | Jones             |                              |                  | Duke University Eye Center                           | Durham, NC                               | Coordinator                                             | Steering Committee                                                                         |
| Denise                                                          | Hug               |                              |                  | Children's Mercy Hospitals and Clinics               | Kansas City, MO                          | Investigator                                            |                                                                                            |
| Erin D.                                                         | Stahl             |                              |                  | Children's Mercy Hospitals and Clinics               | Kansas City, MO                          | Investigator                                            |                                                                                            |
| Rebecca J.                                                      | Dent              |                              |                  | Children's Mercy Hospitals and Clinics               | Kansas City, MO                          | Coordinator                                             |                                                                                            |
| Lingkun                                                         | Kong              |                              |                  | Texas Children's Hospital- Dept. Of Ophthalmology    | Houston, TX                              | Coordinator                                             |                                                                                            |
| Serena                                                          | Wang              |                              |                  | Children's Medical Center                            | Dallas, TX                               | Investigator                                            |                                                                                            |
| Bryan K.                                                        | Gallerson         |                              |                  | Children's Medical Center                            | Dallas, TX                               | Coordinator                                             |                                                                                            |
| Amy K.                                                          | Hutchinson        |                              |                  | The Emory Eye Center                                 | Atlanta, GA                              | Investigator                                            |                                                                                            |
| Phoebe                                                          | Lenhart           |                              |                  | The Emory Eye Center                                 | Atlanta, GA                              | Investigator                                            |                                                                                            |
| Judy                                                            | Brower            |                              |                  | The Emory Eye Center                                 | Atlanta, GA                              | Coordinator                                             |                                                                                            |
| David G.                                                        | Morrison          |                              |                  | Vanderbilt Eye Center                                | Nashville, TN                            | Investigator                                            |                                                                                            |
| Scott T.                                                        | Ruark             |                              |                  | Vanderbilt Eye Center                                | Nashville, TN                            | Coordinator                                             |                                                                                            |
| Rebecca                                                         | Mets-Halgrimson   |                              |                  | Ann & Robert H. Lurie Children's Hospital of Chicago | Chicago, IL                              | Investigator                                            |                                                                                            |
| Hawke                                                           | Yoon              |                              |                  | Ann & Robert H. Lurie Children's Hospital of Chicago | Chicago, IL                              | Investigator                                            |                                                                                            |
| Hantamalala                                                     | Ralay-Ranaivo     |                              |                  | Ann & Robert H. Lurie Children's Hospital of Chicago | Chicago, IL                              | Coordinator                                             |                                                                                            |
| Aaliyah                                                         | Hamidullah        |                              |                  | Ann & Robert H. Lurie Children's Hospital of Chicago | Chicago, IL                              | Coordinator                                             |                                                                                            |
| Raymond                                                         | Areaux            |                              |                  | University of Minnesota                              | Minneapolis, MN                          | Investigator                                            |                                                                                            |
| Jill S.                                                         | Anderson          |                              |                  | University of Minnesota                              | Minneapolis, MN                          | Investigator                                            |                                                                                            |
| Ann M.                                                          | Holleschau        |                              |                  | University of Minnesota                              | Minneapolis, MN                          | Investigator                                            |                                                                                            |

Supplemental Online Material: Nonauthor Collaborators

\*Indicates required information. Only first name, last name, and suffix will appear in PubMed.

| *First Name and Middle Initial(s) | *Last Name | *Suffix (eg, Jr, III) | Academic Degrees | Institution                                                   | Location (city, state/province, country) | Role or Contribution, eg, chair, principal investigator | Group (if more than 1 Group listed in the byline) and/or Subgroup (eg, Steering Committee) |
|-----------------------------------|------------|-----------------------|------------------|---------------------------------------------------------------|------------------------------------------|---------------------------------------------------------|--------------------------------------------------------------------------------------------|
| Rosanne                           | Superstein |                       |                  | CHU- Sainte- Justine                                          | Montreal, Quebec, Canada                 | Investigator                                            |                                                                                            |
| Caroline                          | Belanger   |                       |                  | CHU- Sainte- Justine                                          | Montreal, Quebec, Canada                 | Investigator                                            |                                                                                            |
| Nicole                            | Fallaha    |                       |                  | CHU- Sainte- Justine                                          | Montreal, Quebec, Canada                 | Investigator                                            |                                                                                            |
| Patrick                           | Hamel      |                       |                  | CHU- Sainte- Justine                                          | Montreal, Quebec, Canada                 | Investigator                                            |                                                                                            |
| Maryse                            | Thibeault  |                       |                  | CHU- Sainte- Justine                                          | Montreal, Quebec, Canada                 | Coordinator                                             |                                                                                            |
| Susanna M.                        | Tamkins    |                       |                  | Bascom Palmer Eye Institute                                   | Miami, FL                                | Investigator                                            |                                                                                            |
| Ta                                | Chang      |                       |                  | Bascom Palmer Eye Institute                                   | Miami, FL                                | Investigator                                            |                                                                                            |
| Hee-Jung S.                       | Park       |                       |                  | Wilmer Institute                                              | Baltimore, MD                            | Investigator                                            |                                                                                            |
| Anya A.                           | Trumler    |                       |                  | Wilmer Institute                                              | Baltimore, MD                            | Investigator                                            |                                                                                            |
| Xiaonong                          | Liu        |                       |                  | Wilmer Institute                                              | Baltimore, MD                            | Coordinator                                             |                                                                                            |
| Emi N.                            | Sanders    |                       |                  | Alberta Children's Hospital                                   | Calgary, Alberta, Canada                 | Coordinator                                             |                                                                                            |
| Elias                             | Traboulsi  |                       |                  | Cole Eye Institute                                            | Cleveland, OH                            | Investigator                                            |                                                                                            |
| Fatema                            | Ghasia     |                       |                  | Cole Eye Institute                                            | Cleveland, OH                            | Investigator                                            |                                                                                            |
| Diana C.                          | McOwen     |                       |                  | Cole Eye Institute                                            | Cleveland, OH                            | Coordinator                                             |                                                                                            |
| Michael E.                        | Gray       |                       |                  | Cincinnati Children's Hospital                                | Cincinnati, OH                           | Investigator                                            |                                                                                            |
| Michael B.                        | Yang       |                       |                  | Cincinnati Children's Hospital                                | Cincinnati, OH                           | Investigator                                            |                                                                                            |
| Corey S.                          | Bowman     |                       |                  | Cincinnati Children's Hospital                                | Cincinnati, OH                           | Coordinator                                             |                                                                                            |
| Jennifer                          | Galvin     |                       |                  | Yale univ Med School Dept. of Ophthal & Visual Science        | New Haven, CT                            | Investigator                                            |                                                                                            |
| Margaret                          | Therriault |                       |                  | Yale univ Med School Dept. of Ophthal & Visual Science        | New Haven, CT                            | Coordinator                                             |                                                                                            |
| Heather                           | Smith      |                       |                  | Riley Hospital for Children                                   | Indianapolis, IN                         | Investigator                                            |                                                                                            |
| Michele E.                        | Whitaker   |                       |                  | Riley Hospital for Children                                   | Indianapolis, IN                         | Coordinator                                             |                                                                                            |
| Faruk                             | Orge       |                       |                  | Rainbow Babies and Children's Hospital Dept. of Ophthalmology | Cleveland, OH                            | Investigator                                            |                                                                                            |

## Supplemental Online Material: Nonauthor Collaborators

\*Indicates required information. Only first name, last name, and suffix will appear in PubMed.

| *First Name and Middle Initial(s) | *Last Name | *Suffix (eg, Jr, III) | Academic Degrees | Institution                                                   | Location (city, state/province, country) | Role or Contribution, eg, chair, principal investigator | Group (if more than 1 Group listed in the byline) and/or Subgroup (eg, Steering Committee) |
|-----------------------------------|------------|-----------------------|------------------|---------------------------------------------------------------|------------------------------------------|---------------------------------------------------------|--------------------------------------------------------------------------------------------|
| Adriana P.                        | Grigorian  |                       |                  | Rainbow Babies and Children's Hospital Dept. of Ophthalmology | Cleveland, OH                            | Investigator                                            |                                                                                            |
| Alicia M.                         | Baird      |                       |                  | Rainbow Babies and Children's Hospital Dept. of Ophthalmology | Cleveland, OH                            | Coordinator                                             |                                                                                            |
| Mitchell B.                       | Strominger |                       |                  | Tufts Medical Center                                          | Boston, MA                               | Investigator                                            |                                                                                            |
| Vicki                             | Chen       |                       |                  | Tufts Medical Center                                          | Boston, MA                               | Investigator                                            |                                                                                            |
| Shelley                           | Klein      |                       |                  | Tufts Medical Center                                          | Boston, MA                               | Coordinator                                             |                                                                                            |
| Jacquelyn D.                      | Kemmer     |                       |                  | University of California San Francisco Dept. of Ophthalmology | San Francisco, CA                        | Coordinator                                             |                                                                                            |
| Alexandra E.                      | Neiman     |                       |                  | University of California San Francisco Dept. of Ophthalmology | San Francisco, CA                        | Coordinator                                             |                                                                                            |
| Myra N.                           | Mendoza    |                       |                  | Wolfe Clinic                                                  | West Des Moines, IA                      | Investigator                                            |                                                                                            |
| Jill J.                           | Frohwein   |                       |                  | Wolfe Clinic                                                  | West Des Moines, IA                      | Coordinator                                             |                                                                                            |
| Don                               | Bremer     |                       |                  | Pediatric Ophthalmology Associates                            | Columbus, OH                             | Investigator                                            |                                                                                            |
| Cybil                             | Cassady    |                       |                  | Pediatric Ophthalmology Associates                            | Columbus, OH                             | Investigator                                            |                                                                                            |
| Richard                           | Golden     |                       |                  | Pediatric Ophthalmology Associates                            | Columbus, OH                             | Investigator                                            |                                                                                            |
| Catherine                         | Jordan     |                       |                  | Pediatric Ophthalmology Associates                            | Columbus, OH                             | Investigator                                            |                                                                                            |
| David                             | Rogers     |                       |                  | Pediatric Ophthalmology Associates                            | Columbus, OH                             | Investigator                                            |                                                                                            |
| Sara A.                           | Oravec     |                       |                  | Pediatric Ophthalmology Associates                            | Columbus, OH                             | Coordinator                                             |                                                                                            |
| Tammy L.                          | Yanovitch  |                       |                  | Dean McGee Eye Institute                                      | Oklahoma City, OK                        | Investigator                                            |                                                                                            |
| Keven                             | Lunsford   |                       |                  | Dean McGee Eye Institute                                      | Oklahoma City, OK                        | Coordinator                                             |                                                                                            |
| Christina                         | Nye        |                       |                  | Northwest Pediatric Ophthalmology                             | Spokane, WA                              | Investigator                                            |                                                                                            |
| Caroline                          | Shea       |                       |                  | Northwest Pediatric Ophthalmology                             | Spokane, WA                              | Investigator                                            |                                                                                            |

## Supplemental Online Material: Nonauthor Collaborators

\*Indicates required information. Only first name, last name, and suffix will appear in PubMed.

| *First Name and Middle Initial(s) | *Last Name    | *Suffix (eg, Jr, III) | Academic Degrees | Institution                              | Location (city, state/province, country) | Role or Contribution, eg, chair, principal investigator | Group (if more than 1 Group listed in the byline) and/or Subgroup (eg, Steering Committee) |
|-----------------------------------|---------------|-----------------------|------------------|------------------------------------------|------------------------------------------|---------------------------------------------------------|--------------------------------------------------------------------------------------------|
| SueAnn M.                         | Stillman      |                       |                  | Northwest Pediatric Ophthalmology        | Spokane, WA                              | Coordinator                                             |                                                                                            |
| G. Robert                         | LaRoche       |                       |                  | IWK Health Centre                        | Halifax, Nova Scotia, Canada             | Investigator                                            |                                                                                            |
| Stephen C.                        | Van Iderstine |                       |                  | IWK Health Centre                        | Halifax, Nova Scotia, Canada             | Coordinator                                             |                                                                                            |
| Elisa                             | Robertson     |                       |                  | University of Utah/Moran Eye Center      | Salt Lake City, UT                       | Coordinator                                             |                                                                                            |
| Oscar A.                          | Cruz          |                       |                  | Saint Louis University Institute         | St. Louis, MO                            | Investigator                                            |                                                                                            |
| Rafif                             | Ghadban       |                       |                  | Saint Louis University Institute         | St. Louis, MO                            | Investigator                                            |                                                                                            |
| Dawn                              | Govreau       |                       |                  | Saint Louis University Institute         | St. Louis, MO                            | Coordinator                                             |                                                                                            |
| Scott A.                          | Larson        |                       |                  | University of Iowa Hospitals and Clinics | Iowa City, IA                            | Investigator                                            |                                                                                            |
| Susannah                          | Longmuir      |                       |                  | University of Iowa Hospitals and Clinics | Iowa City, IA                            | Investigator                                            |                                                                                            |
| Xiaoyan                           | Shan          |                       |                  | University of Iowa Hospitals and Clinics | Iowa City, IA                            | Coordinator                                             |                                                                                            |
| Michael P.                        | Clarke        |                       |                  | Newcastle upon Tyne Hospitals NHS Trust  | Newcastle Upon Tyne, Tyne and Wear       | Investigator                                            |                                                                                            |
| Kate                              | Taylor        |                       |                  | Newcastle upon Tyne Hospitals NHS Trust  | Newcastle Upon Tyne, Tyne and Wear       | Coordinator                                             |                                                                                            |
| Christine                         | Powell        |                       |                  | Newcastle upon Tyne Hospitals NHS Trust  | Newcastle Upon Tyne, Tyne and Wear       | Coordinator                                             |                                                                                            |
| Benjamin P.                       | Hammond       |                       |                  | Flaum Eye Institute                      | Rochester, NY                            | Investigator                                            |                                                                                            |
| Matthew D.                        | Gearinger     |                       |                  | Flaum Eye Institute                      | Rochester, NY                            | Investigator                                            |                                                                                            |
| Andrea                            | Czubinski     |                       |                  | Flaum Eye Institute                      | Rochester, NY                            | Coordinator                                             |                                                                                            |
| Dorothy H.                        | Hendricks     |                       |                  | A.I. duPont Hospital for Children        | Wilmington, DE                           | Investigator                                            |                                                                                            |
| Jing                              | Jin           |                       |                  | A.I. duPont Hospital for Children        | Wilmington, DE                           | Investigator                                            |                                                                                            |
| Jonathan H.                       | Salvin        |                       |                  | A.I. duPont Hospital for Children        | Wilmington, DE                           | Investigator                                            |                                                                                            |
| Alicia                            | Fisher        |                       |                  | A.I. duPont Hospital for Children        | Wilmington, DE                           | Coordinator                                             |                                                                                            |
| Katherine A.                      | Lee           |                       |                  | St. Luke's Hospital                      | Boise, ID                                | Investigator                                            | Executive Committee                                                                        |

## Supplemental Online Material: Nonauthor Collaborators

\*Indicates required information. Only first name, last name, and suffix will appear in PubMed.

| *First Name and Middle Initial(s) | *Last Name | *Suffix (eg, Jr, III) | Academic Degrees | Institution                                                            | Location (city, state/province, country) | Role or Contribution, eg, chair, principal investigator | Group (if more than 1 Group listed in the byline) and/or Subgroup (eg, Steering Committee) |
|-----------------------------------|------------|-----------------------|------------------|------------------------------------------------------------------------|------------------------------------------|---------------------------------------------------------|--------------------------------------------------------------------------------------------|
| Daniel                            | Brooks     |                       |                  | St. Luke's Hospital                                                    | Boise, ID                                | Investigator                                            |                                                                                            |
| Bonita R.                         | Schweinler |                       |                  | St. Luke's Hospital                                                    | Boise, ID                                | Coordinator                                             |                                                                                            |
| Nicholas A.                       | Sala       |                       |                  | Pediatric Ophthalmology of Erie                                        | Erie, PA                                 | Investigator                                            |                                                                                            |
| Allyson M.                        | Sala       |                       |                  | Pediatric Ophthalmology of Erie                                        | Erie, PA                                 | Coordinator                                             |                                                                                            |
| Allison I.                        | Summers    |                       |                  | Casey Eye Institute                                                    | Portland, OR                             | Investigator                                            |                                                                                            |
| Daniel J.                         | Karr       |                       |                  | Casey Eye Institute                                                    | Portland, OR                             | Investigator                                            |                                                                                            |
| Lorri B.                          | Wilson     |                       |                  | Casey Eye Institute                                                    | Portland, OR                             | Investigator                                            |                                                                                            |
| Paula K.                          | Rauch      |                       |                  | Casey Eye Institute                                                    | Portland, OR                             | Coordinator                                             |                                                                                            |
| Mary                              | O'Hara     |                       |                  | University of California,Davis Dept. of Ophthalmology                  | Sacramento, CA                           | Investigator                                            |                                                                                            |
| Nandini                           | Gandhi     |                       |                  | University of California,Davis Dept. of Ophthalmology                  | Sacramento, CA                           | Investigator                                            |                                                                                            |
| Tania                             | Hashmi     |                       |                  | University of California,Davis Dept. of Ophthalmology                  | Sacramento, CA                           | Coordinator                                             |                                                                                            |
| Jeffrey                           | Colburn    |                       |                  | Spokane Eye Clinic                                                     | Spokane, WA                              | Investigator                                            |                                                                                            |
| Eileen                            | Dittman    |                       |                  | Spokane Eye Clinic                                                     | Spokane, WA                              | Coordinator                                             |                                                                                            |
| Charles R.                        | Whitfill   |                       |                  | Charles R. Whitfill, M.D.                                              | Wichita, KS                              | Investigator                                            |                                                                                            |
| Amy M.                            | Wheeler    |                       |                  | Charles R. Whitfill, M.D.                                              | Wichita, KS                              | Coordinator                                             |                                                                                            |
| Emily A.                          | McCourt    |                       |                  | University of Colorado HSC                                             | Aurora, CO                               | Investigator                                            |                                                                                            |
| Jasleen                           | Singh      |                       |                  | University of Colorado HSC                                             | Aurora, CO                               | Investigator                                            |                                                                                            |
| Nanastasia                        | Welnick    |                       |                  | University of Colorado HSC                                             | Aurora, CO                               | Coordinator                                             |                                                                                            |
| Nathalie F.                       | Azar       |                       |                  | University of Illinois at Chicago Eye and Ear Infirmary                | Chicago, IL                              | Investigator                                            |                                                                                            |
| Joseph                            | Baker      |                       |                  | University of Illinois at Chicago Eye and Ear Infirmary                | Chicago, IL                              | Coordinator                                             |                                                                                            |
| Patrick J.                        | Droste     |                       |                  | Pediatric Ophthalmologist, P.C.                                        | Grand Rapids, MI                         | Investigator                                            |                                                                                            |
| Robert J.                         | Peters     |                       |                  | Pediatric Ophthalmologist, P.C.                                        | Grand Rapids, MI                         | Investigator                                            |                                                                                            |
| Jan                               | Hilbrands  |                       |                  | Pediatric Ophthalmologist, P.C.                                        | Grand Rapids, MI                         | Coordinator                                             |                                                                                            |
| Stacy L.                          | Pineles    |                       |                  | Jules Stein Eye Institute at the University of California, Los Angeles | Los Angeles, CA                          | Investigator                                            |                                                                                            |

Supplemental Online Material: Nonauthor Collaborators

\*Indicates required information. Only first name, last name, and suffix will appear in PubMed.

| *First Name and Middle Initial(s) | *Last Name        | *Suffix (eg, Jr, III) | Academic Degrees | Institution                                                            | Location (city, state/province, country) | Role or Contribution, eg, chair, principal investigator | Group (if more than 1 Group listed in the byline) and/or Subgroup (eg, Steering Committee) |
|-----------------------------------|-------------------|-----------------------|------------------|------------------------------------------------------------------------|------------------------------------------|---------------------------------------------------------|--------------------------------------------------------------------------------------------|
| Marianne J.                       | Bernardo          |                       |                  | Jules Stein Eye Institute at the University of California, Los Angeles | Los Angeles, CA                          | Coordinator                                             |                                                                                            |
| Edward                            | Peterson          |                       |                  | Pediatric Eye Specialists                                              | Chattanooga, TN                          | Investigator                                            |                                                                                            |
| Charla H.                         | Peterson          |                       |                  | Pediatric Eye Specialists                                              | Chattanooga, TN                          | Coordinator                                             |                                                                                            |
| Kartik                            | Kumar             |                       |                  | University of Texas-Robert Cizik Eye Clinic                            | Houston, TX                              | Investigator                                            |                                                                                            |
| Ephrem                            | Melese            |                       |                  | University of Texas-Robert Cizik Eye Clinic                            | Houston, TX                              | Coordinator                                             |                                                                                            |
| Robert                            | Lingua            |                       |                  | University of California, Irvine- Gavin Herbert Eye Institute          | Irvine, CA                               | Investigator                                            |                                                                                            |
| Jeff                              | Grijalva          |                       |                  | University of California, Irvine- Gavin Herbert Eye Institute          | Irvine, CA                               | Coordinator                                             |                                                                                            |
| Earl R.                           | Crouch            | Jr                    |                  | Virginia Pediatric Eye Center                                          | Norfolk, VA                              | Investigator                                            |                                                                                            |
| Earl R.                           | Crouch            | III                   |                  | Virginia Pediatric Eye Center                                          | Norfolk, VA                              | Investigator                                            | Executive Committee                                                                        |
| Gaylord                           | Ventura           |                       |                  | Virginia Pediatric Eye Center                                          | Norfolk, VA                              | Coordinator                                             |                                                                                            |
| William                           | Anninger          |                       |                  | Children's Hospital of Philadelphia                                    | Philadelphia, PA                         | Investigator                                            |                                                                                            |
| Shawn L.                          | Benson            |                       |                  | Children's Hospital of Philadelphia                                    | Philadelphia, PA                         | Coordinator                                             |                                                                                            |
| Karen A.                          | Karp              |                       |                  | Children's Hospital of Philadelphia                                    | Philadelphia, PA                         | Coordinator                                             |                                                                                            |
| Jordana M.                        | Smith             |                       |                  | University of Arizona Dept. of Ophthalmology & Visual Sciences         | Tucson, AZ                               | Investigator                                            |                                                                                            |
| Jill                              | Brickman-Kelleher |                       |                  | University of Arizona Dept. of Ophthalmology & Visual Sciences         | Tucson, AZ                               | Coordinator                                             |                                                                                            |
| Benjamin H.                       | Ticho             |                       |                  | The Eye Specialists Center, L.L.C.                                     | Chicago Ridge, IL                        | Investigator                                            |                                                                                            |
| Alexander J.                      | Khammar           |                       |                  | The Eye Specialists Center, L.L.C.                                     | Chicago Ridge, IL                        | Investigator                                            |                                                                                            |
| Deborah A.                        | Clausius          |                       |                  | The Eye Specialists Center, L.L.C.                                     | Chicago Ridge, IL                        | Coordinator                                             |                                                                                            |
| Suquin                            | Guo               |                       |                  | Institute of Ophthalmology and Visual Science, NJMS, UMDNJ             | Newark, NJ                               | Investigator                                            |                                                                                            |
| Donny                             | Suh               |                       |                  | University of Nebraska Medical Center                                  | Omaha, NE                                | Investigator                                            |                                                                                            |

## Supplemental Online Material: Nonauthor Collaborators

\*Indicates required information. Only first name, last name, and suffix will appear in PubMed.

| *First Name and Middle Initial(s) | *Last Name   | *Suffix (eg, Jr, III) | Academic Degrees | Institution                                                              | Location (city, state/province, country) | Role or Contribution, eg, chair, principal investigator | Group (if more than 1 Group listed in the byline) and/or Subgroup (eg, Steering Committee) |
|-----------------------------------|--------------|-----------------------|------------------|--------------------------------------------------------------------------|------------------------------------------|---------------------------------------------------------|--------------------------------------------------------------------------------------------|
| Carolyn                           | Chamberlain  |                       |                  | University of Nebraska Medical Center                                    | Omaha, NE                                | Coordinator                                             |                                                                                            |
| Susan                             | Schloff      |                       |                  | Associated Eye Care                                                      | Saint Paul, MN                           | Investigator                                            |                                                                                            |
| William P.                        | Madigan      |                       |                  | Children's National Medical Center                                       | Washington, DC                           | Investigator                                            |                                                                                            |
| Donna                             | Burkman      |                       |                  | Children's National Medical Center                                       | Washington, DC                           | Coordinator                                             |                                                                                            |
| Stephen P.                        | Christiansen |                       |                  | Boston Medical Center                                                    | Boston, MA                               | Investigator                                            |                                                                                            |
| Jean E.                           | Ramsey       |                       |                  | Boston Medical Center                                                    | Boston, MA                               | Investigator                                            |                                                                                            |
| Kate H.                           | McConnell    |                       |                  | Boston Medical Center                                                    | Boston, MA                               | Coordinator                                             |                                                                                            |
| Ilana                             | Friedman     |                       |                  | Montefiore Medical Center                                                | Bronx, NY                                | Investigator                                            |                                                                                            |
| Jose                              | Rosado       |                       |                  | Montefiore Medical Center                                                | Bronx, NY                                | Coordinator                                             |                                                                                            |
| Donald P.                         | Sauberan     |                       |                  | Eye Surgical Associates                                                  | Lincoln, NE                              | Investigator                                            |                                                                                            |
| Jody C.                           | Hemberger    |                       |                  | Eye Surgical Associates                                                  | Lincoln, NE                              | Coordinator                                             |                                                                                            |
| Patricia L.                       | Davis        |                       |                  | Progressive Eye Care                                                     | Lisle, IL                                | Investigator                                            |                                                                                            |
| Indre                             | Rudaitis     |                       |                  | Progressive Eye Care                                                     | Lisle, IL                                | Investigator                                            |                                                                                            |
| Robert S.                         | Lowery       |                       |                  | Arkansas Children's Hospital/<br>University of Arkansas Medical Sciences | Little Rock, AR                          | Investigator                                            |                                                                                            |
| Shawn                             | Cupit        |                       |                  | Arkansas Children's Hospital/<br>University of Arkansas Medical Sciences | Little Rock, AR                          | Coordinator                                             |                                                                                            |
| Brian G.                          | Mohney       |                       |                  | Mayo Clinic                                                              | Rochester, MN                            | Investigator                                            |                                                                                            |
| Suzanne M.                        | Wernimont    |                       |                  | Mayo Clinic                                                              | Rochester, MN                            | Coordinator                                             |                                                                                            |
| Rebecca A.                        | Neilsen      |                       |                  | Mayo Clinic                                                              | Rochester, MN                            | Coordinator                                             |                                                                                            |
| Erin P.                           | Herlihy      |                       |                  | Seattle Children's Hospital                                              | Seattle, WA                              | Investigator                                            |                                                                                            |
| Francine                          | Baran        |                       |                  | Seattle Children's Hospital                                              | Seattle, WA                              | Investigator                                            |                                                                                            |
| Amy                               | Gladstone    |                       |                  | Seattle Children's Hospital                                              | Seattle, WA                              | Coordinator                                             |                                                                                            |
| Justin                            | Smith        |                       |                  | Harvard Vanguard Medical Associates                                      | Boston, MA                               | Investigator                                            |                                                                                            |

## Supplemental Online Material: Nonauthor Collaborators

\*Indicates required information. Only first name, last name, and suffix will appear in PubMed.

| *First Name and Middle Initial(s) | *Last Name  | *Suffix (eg, Jr, III) | Academic Degrees | Institution                         | Location (city, state/province, country) | Role or Contribution, eg, chair, principal investigator | Group (if more than 1 Group listed in the byline) and/or Subgroup (eg, Steering Committee) |
|-----------------------------------|-------------|-----------------------|------------------|-------------------------------------|------------------------------------------|---------------------------------------------------------|--------------------------------------------------------------------------------------------|
| Mei                               | Mellott     |                       |                  | Harvard Vanguard Medical Associates | Boston, MA                               | Investigator                                            |                                                                                            |
| Troy                              | Kieser      |                       |                  | Harvard Vanguard Medical Associates | Boston, MA                               | Coordinator                                             |                                                                                            |
| S. Ayse                           | Erzurum     |                       |                  | Eye Care Associates, Inc.           | Poland, OH                               | Investigator                                            | Executive Committee                                                                        |
| Beth                              | Colon       |                       |                  | Eye Care Associates, Inc.           | Poland, OH                               | Coordinator                                             |                                                                                            |
| Birva                             | Shah        |                       |                  | The Eye Specialist Center, LLC      | Munster, IN                              | Investigator                                            |                                                                                            |
| Micaela                           | Quebbemann  |                       |                  | The Eye Specialist Center, LLC      | Munster, IN                              | Coordinator                                             |                                                                                            |
| Roy W.                            | Beck        |                       |                  | Jaeb Center for Health Research     | Tampa, FL                                | Coordinating Center                                     | Executive Committee                                                                        |
| Darrell S.                        | Austin      |                       |                  | Jaeb Center for Health Research     | Tampa, FL                                | Coordinating Center                                     |                                                                                            |
| Nicole M.                         | Boyle       |                       |                  | Jaeb Center for Health Research     | Tampa, FL                                | Coordinating Center                                     |                                                                                            |
| Courtney L.                       | Conner      |                       |                  | Jaeb Center for Health Research     | Tampa, FL                                | Coordinating Center                                     |                                                                                            |
| Danielle L.                       | Chandler    |                       |                  | Jaeb Center for Health Research     | Tampa, FL                                | Coordinating Center                                     |                                                                                            |
| Quayleen                          | Donahue     |                       |                  | Jaeb Center for Health Research     | Tampa, FL                                | Coordinating Center                                     |                                                                                            |
| Brooke P.                         | Fimbel      |                       |                  | Jaeb Center for Health Research     | Tampa, FL                                | Coordinating Center                                     |                                                                                            |
| Julianne L.                       | Robinson    |                       |                  | Jaeb Center for Health Research     | Tampa, FL                                | Coordinating Center                                     |                                                                                            |
| Amra                              | Hercinovic  |                       |                  | Jaeb Center for Health Research     | Tampa, FL                                | Coordinating Center                                     |                                                                                            |
| James E.                          | Hoepner     |                       |                  | Jaeb Center for Health Research     | Tampa, FL                                | Coordinating Center                                     |                                                                                            |
| Joseph D.                         | Kaplon      |                       |                  | Jaeb Center for Health Research     | Tampa, FL                                | Coordinating Center                                     |                                                                                            |
| Robert J.                         | Henderson   |                       |                  | Jaeb Center for Health Research     | Tampa, FL                                | Coordinating Center                                     |                                                                                            |
| B. Michele                        | Melia       |                       |                  | Jaeb Center for Health Research     | Tampa, FL                                | Coordinating Center                                     | Planning Committee, Steering Committee                                                     |
| Gillaine                          | Ortiz       |                       |                  | Jaeb Center for Health Research     | Tampa, FL                                | Coordinating Center                                     |                                                                                            |
| Victoria C.                       | Woodard     |                       |                  | Jaeb Center for Health Research     | Tampa, FL                                | Coordinating Center                                     |                                                                                            |
| Kathleen M.                       | Stutz       |                       |                  | Jaeb Center for Health Research     | Tampa, FL                                | Coordinating Center                                     |                                                                                            |
| Desirae R.                        | Sutherland  |                       |                  | Jaeb Center for Health Research     | Tampa, FL                                | Coordinating Center                                     |                                                                                            |
| Donald F.                         | Everett     |                       |                  | National Eye Institute              | Bethesda, MD                             | NEI Liason                                              | Executive Committee, DSMC                                                                  |
| Marie                             | Diener-West |                       |                  |                                     |                                          | DSMC Member                                             |                                                                                            |
| John D.                           | Baker       |                       |                  |                                     |                                          | DSMC Member                                             |                                                                                            |
| Barry                             | Davis       |                       |                  |                                     |                                          | DSMC Member                                             |                                                                                            |



## Supplemental Online Material: Nonauthor Collaborators

\*Indicates required information. Only first name, last name, and suffix will appear in PubMed.

| *First Name and Middle Initial(s) | *Last Name         | *Suffix (eg, Jr, III) | Academic Degrees | Institution                                          | Location (city, state/province, country) | Role or Contribution, eg, chair, principal investigator | Group (if more than 1 Group listed in the byline) and/or Subgroup (eg, Steering Committee) |
|-----------------------------------|--------------------|-----------------------|------------------|------------------------------------------------------|------------------------------------------|---------------------------------------------------------|--------------------------------------------------------------------------------------------|
| Dale L.                           | Phelps             |                       |                  |                                                      |                                          | DSMC Member                                             |                                                                                            |
| Stephen W.                        | Poff               |                       |                  |                                                      |                                          | DSMC Member                                             |                                                                                            |
| Richard A.                        | Saunders           |                       |                  |                                                      |                                          | DSMC Member                                             |                                                                                            |
| Lawrence                          | Tychsen            |                       |                  |                                                      |                                          | DSMC Member                                             |                                                                                            |
| Yasmin S.                         | Bradfield          |                       |                  |                                                      |                                          |                                                         | Planning Committee                                                                         |
| Nicole C.                         | Foster             |                       |                  |                                                      |                                          |                                                         | Planning Committee                                                                         |
| David A.                          | Plager             |                       |                  |                                                      |                                          |                                                         | Planning Committee                                                                         |
| Daniel J.                         | Salchow            |                       |                  |                                                      |                                          |                                                         | Planning Committee                                                                         |
| Eileen E.                         | Birch              |                       |                  |                                                      |                                          |                                                         | Executive Committee                                                                        |
| Ruth E.                           | Manny              |                       |                  |                                                      |                                          |                                                         | Executive Committee                                                                        |
| Jayne L.                          | Silver             |                       |                  |                                                      |                                          |                                                         | Executive Committee                                                                        |
| Katherine K.                      | Weise              |                       |                  |                                                      |                                          |                                                         | Executive Committee                                                                        |
| Lisa C.                           | Verderber          |                       |                  |                                                      |                                          |                                                         | Executive Committee                                                                        |
| Trevano W.                        | Dean               |                       |                  | Jaeb Center for Health Research                      | Tampa, FL                                | Coordinating Center                                     |                                                                                            |
| Kimberly G.                       | Yen                |                       |                  | Texas Children's Hospital                            | Houston, TX                              | Investigator                                            |                                                                                            |
| Alejandra G.                      | de Alba Campomanes |                       |                  | University of California                             | San Francisco, San Francisco, CA         | Investigator                                            |                                                                                            |
| Marielle P.                       | Young              |                       |                  | University of Utah, Moran Eye Center                 | Salt Lake City, UT                       | Investigator                                            |                                                                                            |
| Bahram                            | Rahmani            |                       |                  | Ann & Robert H. Lurie Children's Hospital of Chicago | Chicago, IL                              | Investigator                                            |                                                                                            |
| Kathryn M.                        | Haider             |                       |                  | Riley Hospital for Children, Indiana University      | Indianapolis, IN                         | Investigator                                            |                                                                                            |
| George F.                         | Whitehead          |                       |                  | Northwest Pediatric Ophthalmology, P.S.              | Spokane, WA                              | Investigator                                            |                                                                                            |
| Scott R.                          | Lambert            |                       |                  | Stanford University                                  | Palo Alto, CA                            | Investigator                                            |                                                                                            |
| Sudhi P.                          | Kurup              |                       |                  | Ann & Robert H. Lurie Children's Hospital of Chicago | Chicago, IL                              | Investigator                                            |                                                                                            |
| Courtney L.                       | Kraus              |                       |                  | Wilmer Institute                                     | Baltimore, MD                            | Investigator                                            |                                                                                            |
