# Supplementary material
Source: PubMed Central journal article supplement (PMC9936384)
Supplement: jamaophthalmol-e226413-s003.pdf [file jamaophthalmol-e226413-s003.pdf]

## Data Sharing Statement

Bothun. Incidence of Glaucoma-Related Adverse Events in the First 5 Years After Pediatric Lensectomy. *JAMA Ophthalmol.* Published February 16, 2023.

doi:10.1001/jamaophthalmol.2022.6413

### Data

**Data available:** Yes

**Data types:** Deidentified participant data

**How to access data:** Data will be de-identified and made available on the PEDIG public website one year after publication.

**When available:** beginning date: 03-01-2024

### Supporting Documents

**Document types:** None

### Additional Information

**Who can access the data:** Any individual with a valid email address.

**Types of analyses:** any purpose

**Mechanisms of data availability:** N/A
